# Supplementary material for: Effects of Oats, Tartary Buckwheat, and Foxtail Millet Supplementation on Lipid Metabolism, Oxido-Inflammatory Responses, Gut Microbiota, and Colonic SCFA Composition in High-Fat Diet Fed Rats
Source: MDPI journal article supplement (doi:10.3390/nu14132760), 2022-07-04
Supplement: s1 [file s1]

Table S1. Main nutritional contents of cooked oats, tartary buckwheat and foxtail millet.

|                   | Crude fat<br>(g/100 g) | Crude protein<br>(g/100 g) | Crude fiber<br>(g/100 g) | Crude ash<br>(g/100 g) | Moisture content<br>(g/100 g) |
|-------------------|------------------------|----------------------------|--------------------------|------------------------|-------------------------------|
| Oats              | 5.51±0.05              | 14.66±0.11                 | 4.26±0.42                | 1.90±0.00              | 6.42±0.06                     |
| Tartary buckwheat | 3.76±0.01              | 16.13±0.14                 | 8.78±1.00                | 2.56±0.01              | 6.48±0.04                     |
| Foxtail millet    | 4.35±0.29              | 11.87±0.02                 | 2.04±0.20                | 1.19±0.02              | 7.42±0.03                     |

Figure S1

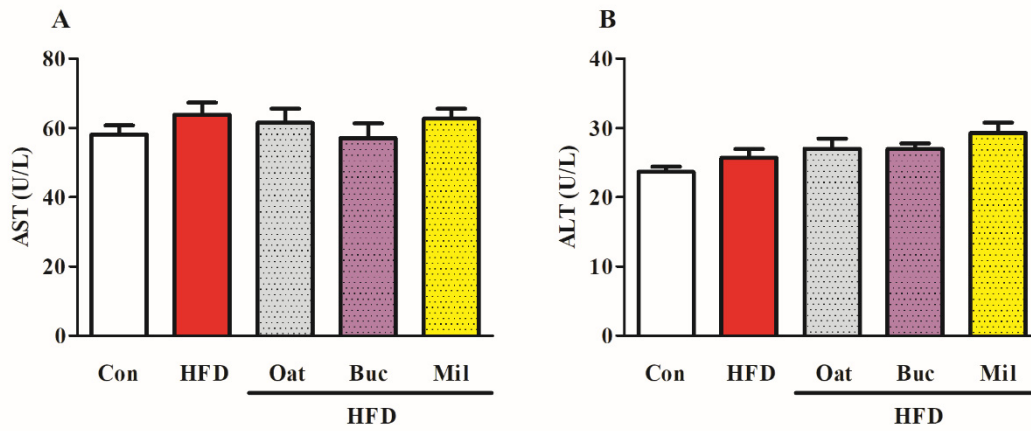

**Figure S1.** Effect of oats, tartary buckwheat and foxtail millet supplementation on serum AST (A) and ALT (B) in high-fat diet fed rats. Con group, a basal diet group; HFD group, a high-fat diet group; Oat group, HFD containing 22% oat group; Buc group, HFD containing 22% tartary buckwheat group; Mil group, HFD containing 22% foxtail millet group; AST, aspartate aminotransferase; ALT, alanine aminotransferase. Data are presented as the mean  $\pm$  SD ( $n = 12$ ).
